1 **Heat efficiently inactivates coronaviruses inside vehicles**

2

3 **Krithika P. Karthigeyan,<sup>1</sup> Chloe Flanigan,<sup>2</sup> Denis Jacob Machado,<sup>3</sup> Alper A., Kiziltas,<sup>4†</sup> Daniel**  
4 **A. Janies<sup>3</sup>, Jay Chen,<sup>4</sup> David Cooke,<sup>5</sup> Marcia V. Lee,<sup>6</sup> Linda J. Saif,<sup>6</sup> Sonny Henegar,<sup>7</sup> Jeff**  
5 **Jahnes,<sup>1,2†</sup> Deborah F. Mielewski,<sup>4</sup> Jesse J. Kwiek<sup>1†</sup>**

6 1. Department of Microbiology, Center for Retrovirus Research, and the Infectious Disease  
7 Institute, The Ohio State University, Columbus, Ohio, USA.

8 2. Applied Microbiology Service Laboratory, Center for Applied Microbiology, The Ohio State  
9 University, Columbus, Ohio, USA.

10 3. University of North Carolina at Charlotte, College of Computing and Informatics, Department  
11 of Bioinformatics and Genomics. Charlotte-NC, USA.

12 4. Ford Research and Innovation Center, 2101 Village Road, Dearborn, Michigan, USA.

13 5. The Center for Automotive Research (CAR), The Ohio State University, Columbus, Ohio,  
14 USA.

15 6. Department of Veterinary Preventive Medicine, Food Animal Health Research Program,  
16 Ohio Agricultural Research and Development Center, The Ohio State University, Wooster,  
17 Ohio, USA.

18 7. Convectex, LLC, Prescott, Arizona, USA.

19 †Co-corresponding authors: [Jahnes.1@osu.edu](mailto:Jahnes.1@osu.edu), [akizilt1@ford.com](mailto:akizilt1@ford.com), [Kwiek.2@osu.edu](mailto:Kwiek.2@osu.edu)

20

## 21 **Abstract**

22 Heat is an established method to inactivate coronaviruses, and there is utility in using heat to  
23 reduce viral load on common touch points in vehicles exposed to a person shedding SARS-CoV-2.  
24 As SARS-CoV-2 is a Biosafety level (BSL)-3 pathogen, real world testing of heat as a sanitation  
25 method for public and private vehicles becomes a challenge, requiring a surrogate coronavirus that  
26 can be handled safely outside of a BSL-3 facility. In this study, we used Bovine Coronavirus  
27 (BCoV) as a surrogate for SARS-CoV-2 to test the efficacy of heat-based betacoronavirus  
28 inactivation. *In vitro*, a 30-minute exposure to 56°C completely inactivated BCoV in solution, and a  
29 15-minute exposure reduced recovery of BCoV >1000-fold. When heated to 56°C for 15 minutes,  
30 the infectivity of BCoV spotted and dried on typical porous and non-porous automobile interior  
31 materials was reduced by 99 - 99.99%. When BCoV was spotted and dried on hard plastic (seat)  
32 material placed inside an out of service transit bus, 56°C heat for 30 minutes reduced BCoV  
33 infectivity 85 - 99.5%. Thus, 56°C is an accessible, rapid, and effective method to inactivate  
34 coronaviruses inside motor vehicles.

## 35 **Introduction**

36 Severe Acute Respiratory Syndrome related Coronavirus-2 (SARS-CoV-2), the causative agent of  
37 Coronavirus disease 2019 (COVID-19), can be inactivated by exposure to heat,<sup>1-5</sup> like several  
38 other viruses.<sup>1,6,7</sup> Heat sensitivity of viruses such as SARS-CoV-2 can be leveraged to sanitize  
39 common touchpoints of public and private vehicles. This sanitization can be done as part of routine  
40 cleaning or as a sanitization protocol following exposure of the vehicle to a person shedding viral  
41 particles.  
42

43  
44 Environmental surveillance has highlighted the persistence of SARS-CoV2 particles in dust  
45 indoors,<sup>8</sup> and several studies have documented the prevalence of SARS-CoV-2 particles in  
46 ambient air and surfaces of public vehicles.<sup>9,10</sup> We sought to test the ability of heat to inactivate  
47 coronaviruses on high-touch materials commonly found in both cars and public transportation  
48 vehicles. Owing to its classification as a Biosafety level (BSL) 3 pathogen, SARS-CoV-2 cannot be  
49 tested in field studies, so we elected to use Bovine Coronavirus (BCoV). BCoV has been used as a  
50 surrogate for SARS and Middle Eastern Respiratory Syndrome (MERS) coronaviruses,<sup>11</sup> and like  
51 SARS and SARS-CoV-2, BCoV belongs to the *Betacoronavirus* genus of the *Coronaviridae* family.  
52 Similar to SARS-CoV-2, BCoV infects the upper and lower respiratory tract and gastrointestinal  
53 tract in cattle, and BCoV particles are shed both in fecal secretions as well as upper respiratory  
54 tract secretions.<sup>12</sup> Using BCoV as a surrogate for SARS-CoV-2, we observed that heating  
55 materials to a surface temperature of 56°C followed by a hold at 56°C for 15-30 minutes effectively  
56 inactivated BCoV on relevant materials, both in a controlled laboratory environment and in situ on  
57 seat material placed inside an out-of-service public transportation bus.

## 58 **MATERIALS & METHODS**

59 **Cells and Viruses.** Madin Darby Bovine Kidney (MDBK) cells were maintained in advanced  
60 minimal essential medium (AMEM, Gibco) supplemented with 5% heat-inactivated Fetal Bovine  
61 Serum (FBS), 2 mM L-Glutamine (Gibco), and 1% Antibiotic/Actinomycotic cocktail (Gibco).<sup>13</sup>  
62 BCoV-Mebus (GenBank: U00735.2) was used in all assays.<sup>14</sup> All experiments were approved by  
63 the OSU Institutional Biosafety Committee (protocol # 2020R00000026).  
64

65  
66 **BCoV Propagation in tissue culture.** BCoV-Mebus was propagated according to published  
67 protocols.<sup>13</sup> Specifically, MDBK cells were seeded in T-150 tissue culture flasks, and once  
68 confluent, AMEM was removed, and cells were incubated for 3 hours in minimal essential medium  
69 (MEM, Life Technology, Catalog # 11095114) supplemented with 1x MEM non-essential amino  
70 acids (Gibco) and 1x Antibiotic/Actinomycotic cocktail (Life Technology). Cells were infected with

71 BCoV-Mebus (median tissue culture infectious dose [TCID<sub>50</sub>] of 0.1 to 10) and incubated at 37°C  
72 and 5% CO<sub>2</sub> for one hour. One-hour post-infection, MEM containing 6.5 µg/ml pancreatin was  
73 added and the infected cells were incubated at 37°C and 5% CO<sub>2</sub> for 18 hours. Infected cells were  
74 lysed with two freeze-thaw cycles of -20°C followed by centrifugation at 500 x g for 20 minutes at  
75 4°C. BCoV-Mebus aliquots were stored at -80°C until use.

76  
77 **Passenger automobile material testing.** High touchpoint surfaces inside vehicles include door  
78 handles, steering wheel, gear shift knob, turn and wiper levers, buttons or touchscreens, seat  
79 upholstery and belts, armrests, grab handles and seat adjustments, seat backs, console bins, and  
80 cup holders (Supplemental Figure 1). These components comprise a wide variety of plastics,  
81 including thermoplastic olefin (TPO), nylon 6 (PA6), poly(ethylene) terephthalate (PET), and  
82 poly(vinyl) chloride (PVC). In addition, each of these particular plastic materials is formulated with a  
83 number of fillers and additives that improve properties, processing, durability and performance  
84 characteristics. One cm<sup>2</sup> pieces of each material (test coupons) were placed into a single well of a  
85 12-well dish, in triplicate. Throughout six experiments, an average of 2.7 x 10<sup>6</sup> TCID<sub>50</sub> units of  
86 BCoV-Mebus was spotted as a single drop onto each test coupon and dried in a laminar flow hood  
87 (<12h). Test coupons containing dried viruses were placed into a humidity-controlled incubator set  
88 to 55% relative humidity and 56°C. Surface and air temperatures were monitored using a dual-  
89 input thermocouple (Fluke). Exposure time commenced when the surface temperature reached  
90 56°C.

91  
92 **In situ heat inactivation.** One square centimeter coupons of hard plastic (seat) material were  
93 placed into a single well of a 12-well dish, in triplicate, and an average of 2 x 10<sup>6</sup> TCID<sub>50</sub> units of  
94 BCoV-Mebus was spotted as a single drop onto each test coupon and dried in a laminar flow hood  
95 (<4h). After drying, 12-well dishes were placed into a filter-top disposable animal cage (Innovive),  
96 and the cages were placed inside a transit bus at four locations (indicated in Supplemental Figure  
97 2). To heat the bus, a diesel-powered, indirect fired 500,000 BTU portable heater (Frost Fighter)  
98 was attached to flexible ducts that were fed inside the bus through the back door. One duct was  
99 aimed towards the front of the bus. The second duct was bifurcated inside the bus, with one duct  
100 facing upwards and one duct facing towards the back of the bus (Supplemental Figure 2). The  
101 portion of the back door opening not occupied by the ductwork was covered with insulated  
102 blankets. The front doors were closed during the experiment, as were the windows (with factory  
103 seals).

104  
105 Owing to the documented importance of humidity in coronavirus inactivation,<sup>15</sup> an industrial  
106 humidifier (Ideal Air, capacity 4 liters per hour) attached to a gravity-fed 20L carboy was placed  
107 inside the bus. This system was used to humidify the bus for one hour before initiation of heat  
108 treatment. Hygrometers (VWR) were placed at two locations inside the bus, one at the front and  
109 one at the back of the bus along with four thermocouples. Thermocouples and hygrometers were  
110 monitored without entering the bus. Four filter-top animal cages containing the 12-well dishes  
111 containing seat materials spotted with bovine coronavirus were placed inside the bus at the  
112 following locations: driver's seat, a front passenger seat, a middle passenger seat, and a back  
113 passenger seat. Exposure time commenced when the surface temperature reached 56°C. Control  
114 (unheated) plates remained outside of the bus at ambient temperature in a sealed container.

115  
116 **TCID<sub>50</sub> assay.** Infectious virus was recovered from the materials by adding 1 mL of MEM followed  
117 by orbital shaking for 2 x 10 minutes (ten minutes on each side of the test coupon). After agitation,  
118 MEM was aspirated from the material and virus infectivity was measured using a TCID<sub>50</sub> assay.<sup>16</sup>  
119 Specifically, two days before virus infection, 10,000 MDBK cells were plated in AMEM into each  
120 well of a flat-bottomed 96-well dish. Three hours before infection, AMEM was removed and MEM

121 supplemented with non-essential amino acids (Gibco) and antibiotic/antimycotic was added and  
122 the cells were incubated at 37°C and 5% CO<sub>2</sub>. Following heat treatment (or not in the case of  
123 controls), recovered virions were serially diluted (1:7) and 60 µL of each dilution was added in  
124 duplicate to confluent MDBK cells in MEM. Thus, each treated or control material was assayed in  
125 sextuplicate (triplicates of the material and duplicates of the aspirates). One-hour post-infection, an  
126 additional 60µL MEM containing 6.5 µg/ml pancreatin (Sigma) was added to the cells, and cells  
127 were incubated at 37°C and 5% CO<sub>2</sub> for 48h. Cells were imaged with a SpectraMax Imaging  
128 Cytometer (Molecular Devices) to manually score cytopathogenicity (CPE). TCID<sub>50</sub> values were  
129 calculated using the Reed-Muench method.<sup>17</sup> Bovine Coronavirus half life in solution was  
130 calculated with GraphPad Prism version 9 using a one phase decay fit with a least squares  
131 regression.

132  
133 **Phylogenetic tree construction.** The placement of the BCoV-Mebus strain within the phylogeny  
134 of *Orthocoronavirinae* (including alpha, beta, gamma, and delta coronaviruses) was based on the  
135 most comprehensive evolutionary study of this virus subfamily to date.<sup>18</sup> The phylogenetic tree was  
136 constructed from 2,006 complete and unique genomes of coronaviruses (12 deltacoronavirus, 265  
137 gammacoronaviruses, 630 alphacoronaviruses, and 1,099 betacoronaviruses) downloaded from  
138 NCBI and GISAID. In order to avoid common errors that were identified in leading publications of  
139 the evolution of viruses,<sup>19,20</sup> we used several techniques including: 1) successive outgroup  
140 expansion,<sup>21</sup> 2) genome annotation and multiple sequence alignment (using MAFFT v7.453<sup>22,23</sup>) of  
141 homologous gene partitions (for the polyprotein 1ab, spike, membrane, envelope, and  
142 nucleoprotein genes). Heuristic searches were conducted under the parsimony (using TNT v1.12<sup>24</sup>)  
143 and maximum likelihood (using IQ-TREE v1.6.12<sup>25-28</sup>) optimality criteria. Additionally, we  
144 addressed the potential impact of putative recombination events in a subset of 505 terminals using  
145 RDP v5<sup>29</sup> with the RND and GENECOV algorithms. Additional details on the data and  
146 methodological procedures used for phylogenetic analyses have been previously described.<sup>30</sup>

## 147 **Results**

148 **Selection of a Surrogate Coronavirus.** Worldwide, Bovine coronavirus is a causative agent of  
149 diarrhea in newborn calves, winter dysentery in adult cattle, and respiratory tract illnesses.<sup>31</sup> The  
150 disease leads to significant economic losses in the beef and dairy industry.<sup>32</sup> Bovine coronaviruses  
151 and bovine-like coronaviruses also have well characterized genomes and genetic features.<sup>33,34</sup>  
152 Standard reference strains of BCoV include the Quebec and Mebus (GenBank accession numbers  
153 AF220295.1 and U00735.2, respectively) strains.<sup>35</sup> The most recent and comprehensive  
154 phylogenetic analysis of coronaviruses<sup>18</sup> counts with 2,006 unique genomes of all  
155 *Orthocoronavirinae* genera (*Deltacoronavirus*, *Gammacoronavirus*, *Alphacoronavirus*, and  
156 *Betacoronavirus*). That analysis unequivocally places BCoV strain Mebus within a clade that  
157 includes human coronaviruses (HCoVs) such as HCoV-HKU1, HCoV-OC43, and HCoV-4408  
158 (Figure 1). The phylogenetic position of BCoV strain Mebus favors its strategic application as a  
159 safe proxy to Human CoVs (HCoV). The BCoV strain Mebus is phylogenetically related to HCoVs  
160 associated with mild human diseases (see the blue group in Figure 1). This relation to HCoVs  
161 indicates Mebus is a potential proxy to betacoronaviruses of clinical importance in controlled  
162 experiments. Simultaneously, BCoV strain Mebus is placed outside from groups in which host  
163 transformations from other animals to humans led to severe diseases, including COVID-19 (see  
164 the red group in Figure 1). Therefore, BCoV strain Mebus is sufficiently distant from the SARS-  
165 CoV, MERS-CoV, and SARS-CoV-2 strains that it can be safely used in experiments where human  
166 contact could occur.

167  
168  
169 **Heat-based inactivation of coronaviruses.** Having identified BCoV-Mebus as an accessible  
170 surrogate coronavirus, we next tested the ability of heat to inactivate the virus. Others have shown



171 that passive solar heating of vehicles can achieve air temperatures of 56°C.<sup>9</sup> Ford Motor Company  
172 has demonstrated a unique software solution that controls the powertrain and climate control  
173 systems that can be used to increase and hold interior cabin surface temperatures to 56°C.<sup>36</sup> To  
174 quantify the effect of 56°C on BCoV infectivity, we incubated a solution of  $3.64 \times 10^5 \pm 2 \times 10^5$   
175 (n=4) TCID<sub>50</sub> units of BCoV in MEM at 56°C for 0, 15, 20, 30, or 60 minutes. In comparison to the  
176 unheated virus, heating the virus suspension at 56°C for 15 minutes reduced BCoV infectivity by  
177 over 1000-fold. We were unable to recover any infectious BCoV following heating at 56°C for 30 or  
178 60 minutes (Figure 2). Fitting the data to a single-phase decay returned an average half-life at  
179 56°C of 1.3 minutes (95% Confidence Interval: 1.0, 1.4).

180  
181 Next, we obtained swatches of a representative group of porous and non-porous materials  
182 commonly found inside passenger vehicles (on touch available surfaces) and placed a single drop  
183 of BCoV onto them (Table 1); virus-laden materials were placed inside a biosafety cabinet until dry.  
184 Materials containing dried BCoV were heated in an incubator at constant humidity until the surface  
185 temperature achieved 56°C (average time to achieve 56°C surface temperature =  $29 \pm 7$  minutes,  
186 n=6). Next, the virus-laden materials were held at 56°C for 15 minutes. In all experiments,  
187 infectious virus was never recovered from materials heated to 56°C for 15 minutes, resulting in  
188 99.99% to 99.9999% reduction in virus infectivity when compared to the virus stock solution. To  
189 calculate the relative reduction in viral infectivity, we compared the TCID<sub>50</sub> of BCoV recovered from  
190 untreated materials to the TCID<sub>50</sub> of BCoV recovered from 56°C-treated materials. Compared to  
191 the untreated group, a surface temperature of 56°C held for 15 minutes was sufficient to inactivate  
192 BCoV spotted on all materials, equivalent to a >99% to 99.99% reduction in the amount of  
193 infectious virus recovered (Table 1). Recovery of infectious virus from untreated materials was  
194 highly variable, and because reduction in virus infectivity depends on recovery of infectious virus  
195 from the untreated materials, the magnitude of reduction of infectivity was influenced by virus  
196 interactions with and adherence to the materials.

197  
198 **Heat-based coronavirus inactivation in a transit bus.** To test the ability of heat to inactivate  
199 BCoV *in situ*, we spotted BCoV onto plastic used to form the seats of a public transportation bus.  
200 The plastic coupons containing dried BCoV were placed inside of 12 well tissue culture dishes  
201 placed inside disposable, filter-topped plastic cages, which were then placed at four locations  
202 inside the bus. Next, the bus doors were closed and the humidified vehicle was heated with a  
203 portable, diesel powered heater until surfaces inside the bus reached a temperature of 56°C  
204 (approximately 75 minutes); once a surface temperature of 56°C was achieved, the virus-laden  
205 samples remained on the bus for an additional 30-minute incubation (heat and humidity profiles  
206 plotted in Supplemental Figure 2B). To calculate the relative reduction in viral infectivity, we  
207 compared the TCID<sub>50</sub> of BCoV recovered from unheated (ambient temperature) materials to the  
208 TCID<sub>50</sub> of BCoV recovered from the heated materials. Recoverable virus infectivity from materials  
209 placed on the driver's seat and the front of the bus was reduced by 99.5%, while the middle and  
210 back of the bus was reduced by 85% (Table 2).

## 211 212 **Discussion**

213 Like several other viruses, coronaviruses can be inactivated by exposure to heat in a manner  
214 dependent on the matrix, humidity, and temperature.<sup>37</sup> We observed that BCoV in suspension in  
215 MEM had a half-life of 1.3 minutes when heated to 56°C (Figure 1), which is similar, albeit it  
216 shorter, than the reported half-life of SARS-CoV-2 in a matrix of artificial saliva (half-life of 10.8  
217 minutes at 56°C<sup>15</sup>). Using swatches of a variety of materials found inside the interior cabin of an  
218 automobile, we observed that heating the surface of these materials to 56°C followed by a 15-  
219 minute hold was sufficient to inactivate 99% - 99.99% of infectious viruses. In a real-world, *in situ*

220 test of a transit bus warmed with an external heater, a surface temperature of 56°C followed by a  
221 30-minute hold reduced infectivity of BCoV by 85% - 99.5%.

222  
223 Several sanitation methods can inactivate viruses, including chemical disinfectants,<sup>38</sup> ultraviolet  
224 light,<sup>39</sup> and heat. According to the US Environmental Protection Agency (EPA) guidance on  
225 cleaning and disinfecting public spaces, a primary means to disinfect public and private enclosed  
226 spaces comprises disinfecting surfaces with EPA-approved products (List N) or a bleach solution  
227 or a 70% alcohol solution. The wipe down method is effective if the solution is applied to the  
228 contaminated surfaces according to label instructions, typically for an extended period before being  
229 wiped clean. While effective, there are several limitations to wiping down contaminated surfaces,  
230 including the following: 1) wiping down is laborious, especially when dealing with a fleet of  
231 vehicles, 2) it can be difficult to determine if the disinfectant contacts all surfaces in a complex  
232 space, and 3) solutions that contain bleach, hydrogen peroxide and ammonia can damage,  
233 discolor, and weaken materials.<sup>40</sup> Similar limitations are seen with ultraviolet light, which can be  
234 effective with direct contact but suffers from shadowing and penetration issues when treating  
235 complex surface structures, crevices, and coarse fabrics.<sup>39,41,42</sup>

236  
237 Alternatively, heat can penetrate materials, is not sensitive to shadowing, is easy and inexpensive  
238 to generate, and is well tolerated (to a point) by materials at levels that inactivate viruses.<sup>43</sup> For  
239 instance, long term heat durability testing on vehicles is already performed at temperatures up to  
240 80°C, as air temperatures inside of a closed vehicle can exceed 90°C on a hot day. Therefore, the  
241 polymer materials used in automotive are already stable at 56°C for long exposures. If for some  
242 instance they are not, well-known heat stabilizers called hindered amine light stabilizers (HALS)  
243 can be added to extend heat performance by reducing free radical degradation mechanisms. Heat  
244 works to inactivate viruses by denaturing secondary structures of viral proteins<sup>44</sup> and other  
245 biomolecules, rendering the virus particle non-infectious.<sup>45</sup> Although there are many advantages to  
246 using heat as an inactivation agent, there are also some limitations to consider. Heating to the  
247 desired surface temperature (56°C) could take longer than wiping down surfaces, and there are  
248 likely to be micro climates inside of the heated spaces, which may not achieve the heat and  
249 humidity<sup>49</sup> parameters required for efficient virus inactivation. We attempted to minimize  
250 microclimates inside the bus by circulating the air with fans, but the observed variability in virus  
251 inactivation suggests that the additional optimization of heat and humidity conditions are required  
252 to achieve optimal conditions for virus inactivation. Nevertheless, in the context of automobile  
253 sanitization, heat is readily available through passive heating, through software-solutions that alter  
254 the normal function of the powertrain and the climate control system, or via portable hot air  
255 blowers. Other potential sources include high temperature heat systems currently used for the  
256 remediation of Bed Bugs (*Cimex lectularius*) throughout the pest control industry. Most of these  
257 systems can easily reach and maintain the desired inactivation temperatures of 56°C. Importantly,  
258 heat permeates structures and also sanitizes the air, so long as the air and surfaces achieve the  
259 desired temperature and are held for the determined amount of time. Moreover, unlike the wipe-  
260 down method, heat will also inactivate aerosolized viral particles,<sup>46</sup> which contribute to the  
261 transmission of SARS-CoV-2.<sup>47,48</sup> Thus, heat appears to be a simple and superior solution,  
262 overcoming several limitations of wipe-down, UV light and other sanitation methods.

263  
264 In conclusion, our in vitro and in situ results indicate that 56°C heat is an efficient, inexpensive, and  
265 effective method to disinfect virus laden touchpoints on common vehicle materials, and given that  
266 heat is a practical, safe, and widely applicable, it should be considered as a mode of virus  
267 inactivation for enclosed vehicle spaces.

270 **Acknowledgements**

271 This work was supported by the OSU Infectious Diseases Institute, Ford Motor Company Research  
272 and Innovation Center, and the Cooper Family Foundation. DJM and DJ acknowledge support  
273 from UNC Charlotte and the Belk family. We thank Covectex, LLC for the provision of heaters for  
274 optimization of the in situ experiments, the OSU Center for Automotive Research (CAR) for  
275 logistical support of the transit bus experiments, and Central Ohio Transit Authority (COTA) for  
276 providing an out of service transit bus and seating material samples.  
277

278  
279

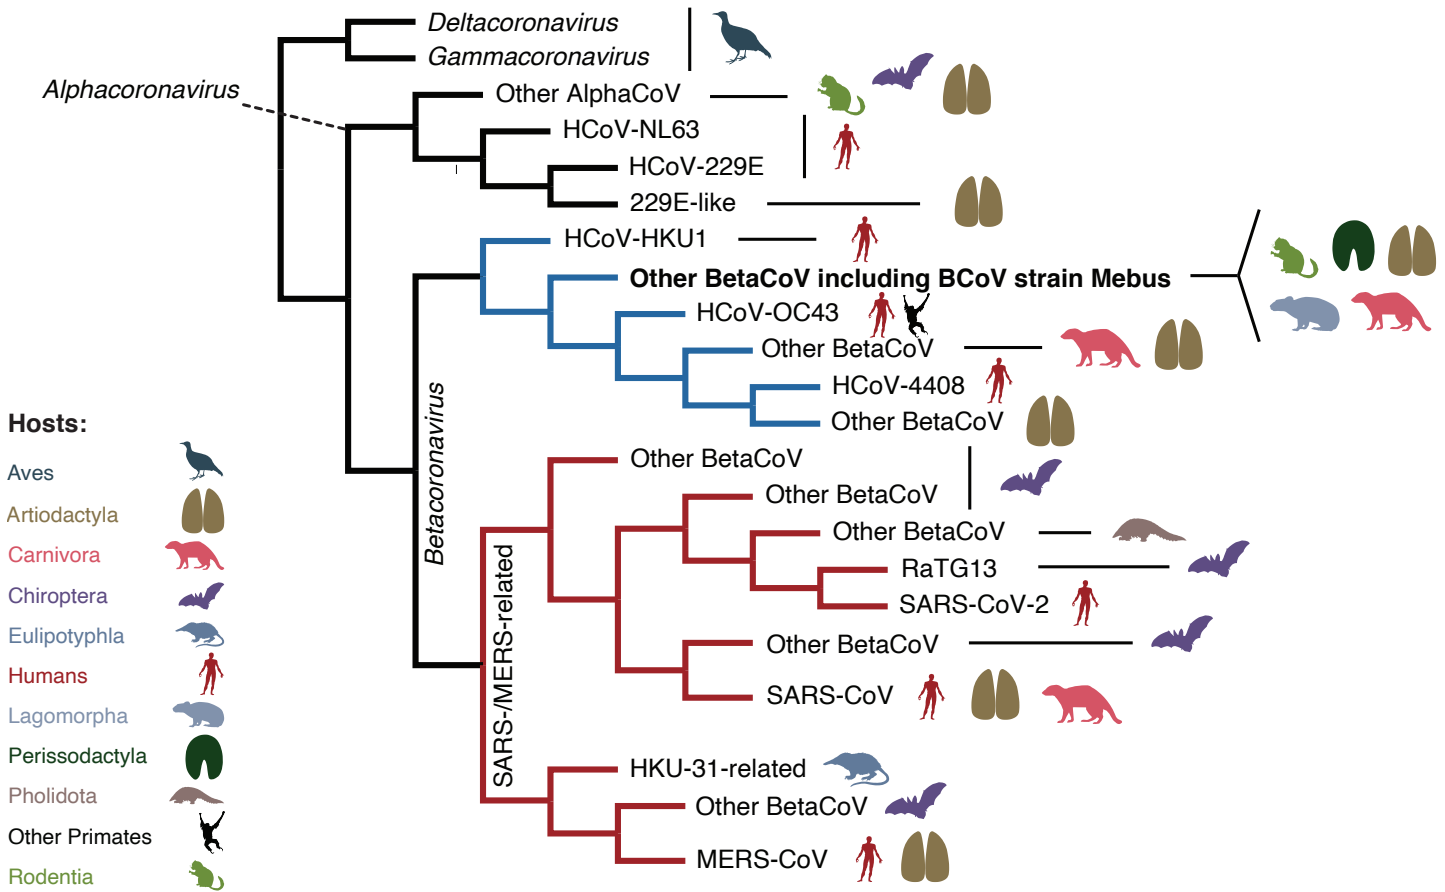

280

281 **Figure 1. Simplified coronavirus consensus tree.** The best heuristic results from parsimony  
 282 analysis were congruent with the maximum likelihood tree. The terminal in bold represents the  
 283 Bovine coronavirus (BCoV) strain Mebus and other betacoronaviruses, nested within a clade that  
 284 includes human coronaviruses (HCoVs) known to cause mild disease in humans (indicated in  
 285 blue). The group in red represents lineages of coronaviruses known to cause severe diseases in  
 286 humans (SARS, MERS, and COVID-19). Redrawn from Fig. S1.1 in Machado et al., (2021).<sup>18</sup>



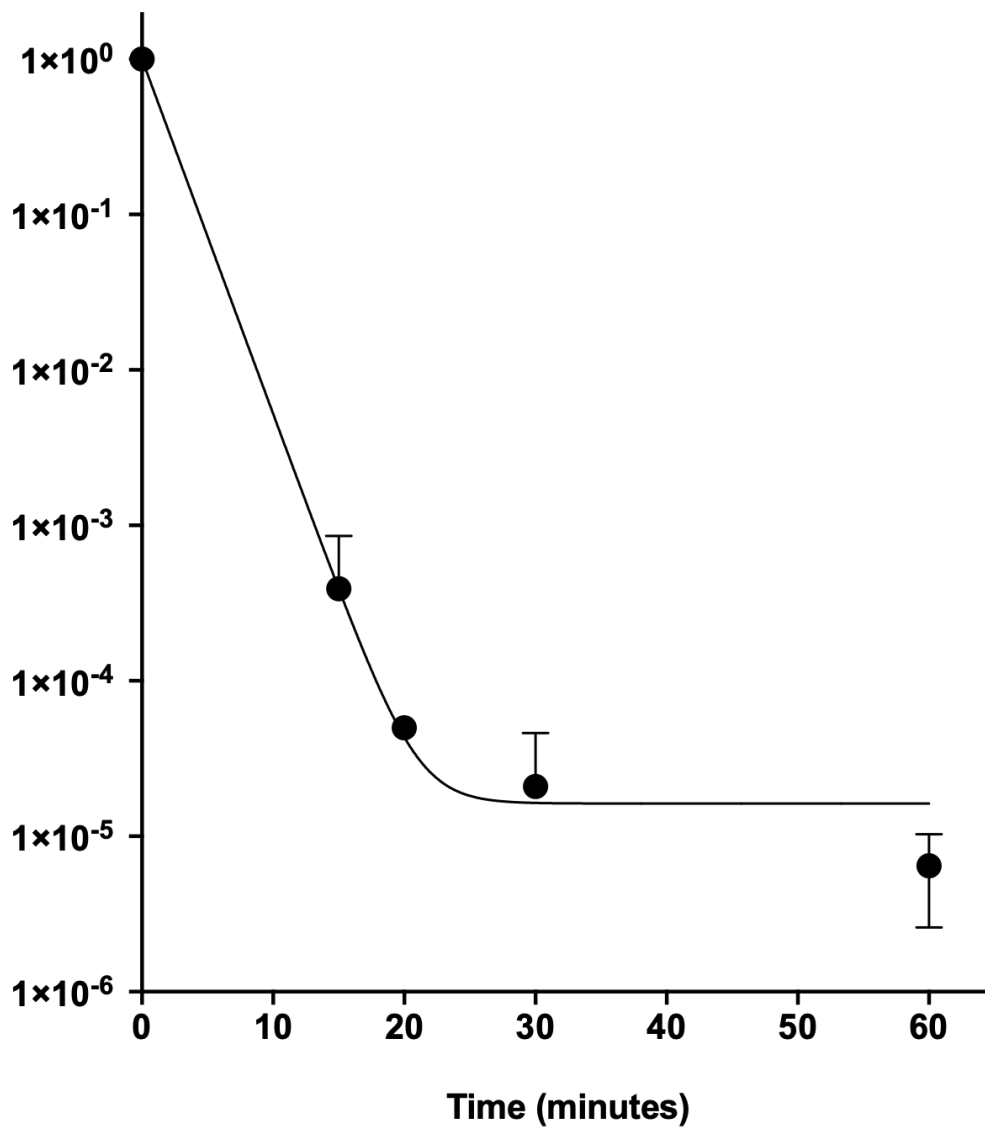

287

288 **Figure 2: Bovine coronavirus (BCoV) decay at 56°C.** BCoV (strain Mebus) suspended in MEM  
289 was placed into a PCR tube and heated at 56°C for the indicated times (n=4). Unheated virus,  
290 heated virus, and no virus control reactions were incubated with MDBK cells in sextuplicate for 48  
291 hours, cytopathogenicity (CPE) was scored, and TCID<sub>50</sub> values were calculated. TCID<sub>50</sub> values  
292 for each experiment were normalized to the unheated (time = 0) time point. The limit of detection  
293 (LoD) for the CPE assay is equivalent to TCID<sub>50</sub>=1. When CPE was undetectable, TCID<sub>50</sub> was set  
294 to 1 (LoD). Point estimate, standard deviation, and best fit line for a single-phase exponential  
295 decay are plotted. The half-life of BCoV at 56°C is 1.3 minutes (95% confidence interval = 1.0,  
296 1.4).

297

298

299

300

| <b>MATERIAL</b>                                                                                                    | <b>TCID<sub>50</sub><br/>(unheated)</b> | <b>TCID<sub>50</sub><br/>(heated)</b> | <b>Reduction</b> |
|--------------------------------------------------------------------------------------------------------------------|-----------------------------------------|---------------------------------------|------------------|
| Virus suspension (liquid)                                                                                          | 1.98E+06                                | N/A                                   | N/A              |
| Tissue culture dish plastic                                                                                        | 3.02E+04                                | nd                                    | >99.99%          |
| PVC black vinyl, seat and trim covering                                                                            | 5.50E+02                                | nd                                    | >99%             |
| PET for automotive interior fabric                                                                                 | 1.55E+02                                | nd                                    | >99%             |
| PET stamped fabric                                                                                                 | 7.84E+02                                | nd                                    | >99%             |
| (PET or nylon 6) carpet floor mats                                                                                 | 1.12E+02                                | nd                                    | >99%             |
| 30% glass fiberfilled nylon6, mold-in-color for door handle applications                                           | 5.49E+03                                | nd                                    | >99.9%           |
| 20% talc-filled thermoplastic olefin (TPO) (medium impact and high scratch) for class-A, visible interior surfaces | 5.48E+04                                | nd                                    | >99.99%          |
| PVC Floor vinyl                                                                                                    | 4.06E+04                                | nd                                    | >99.99%          |

301 **Table I: Inactivation of Bovine Coronavirus on materials found inside automobile cabins.** A  
302 single spot of Bovine coronavirus (Mebus) was dried onto several typical automotive surface  
303 materials, heated to a surface temperature of 56°C (50% relative humidity), and held at 56°C for  
304 fifteen minutes. Infectious bovine coronavirus (mebus) was recovered from both heated and  
305 unheated materials and cytopathic effects (CPE) were quantified by visual scoring 48h post-  
306 infection. Nd: below the level of detection; PVC: polyvinyl chloride; PET: polyethylene  
307 terephthalate; PA6: Polyamide; TPO: thermoplastic olefin.

308

309

310

311

312

313

314

315

316

317

| <b>Location</b>                  | <b>TCID<sub>50</sub></b> | <b>Reduction in infectivity following incubation at 56°C for 30 minutes</b> |
|----------------------------------|--------------------------|-----------------------------------------------------------------------------|
| <b>Virus suspension (liquid)</b> | 2.23E+06                 | N/A                                                                         |
| <b>No heat control</b>           | 5.06E+02                 | Referent                                                                    |
| <b>Driver</b>                    | nd                       | 99.5%                                                                       |
| <b>Front</b>                     | nd                       | 99.5%                                                                       |
| <b>Middle</b>                    | 7.73E+01                 | 85%                                                                         |
| <b>Back</b>                      | 7.56E+01                 | 85%                                                                         |

318 **Table 2: Inactivation of Bovine Coronavirus inside the cabin of a transit bus.** A single spot of  
319 Bovine coronavirus (Mebus) was dried onto plastic used to form seats, virus-laden coupons of the  
320 seat plastic were placed throughout the bus (Supplemental figure 2), the interior of the bus was  
321 humidified and heated to a surface temperature of 56°C, and held at 56°C for thirty minutes.  
322 Infectious bovine coronavirus (mebus) was recovered from both heated and unheated material and  
323 cytopathic effects (CPE) were quantified by visual scoring 48h post-infection. Nd: below the level of  
324 detection.

325

326

327 **References**

- 328 1. Kampf, G., Voss, A. & Scheithauer, S. Inactivation of coronaviruses by heat. *Journal of*  
329 *Hospital Infection* (2020). doi:10.1016/j.jhin.2020.03.025
- 330 2. Chin, A. W. H. *et al.* Stability of SARS-CoV-2 in different environmental conditions. *The*  
331 *Lancet Microbe* (2020). doi:10.1016/s2666-5247(20)30003-3
- 332 3. Jin, Y. *et al.* Virology, epidemiology, pathogenesis, and control of covid-19. *Viruses* (2020).  
333 doi:10.3390/v12040372
- 334 4. Yang, P. & Wang, X. COVID-19: a new challenge for human beings. *Cellular and Molecular*  
335 *Immunology* (2020). doi:10.1038/s41423-020-0407-x
- 336 5. Fischer, R. *et al.* Assessment of N95 respirator decontamination and re-use for SARS-CoV-  
337 2. *medRxiv* (2020). doi:10.1101/2020.04.11.20062018
- 338 6. Rabenau, H. F. *et al.* Stability and inactivation of SARS coronavirus. *Med. Microbiol.*  
339 *Immunol.* (2005). doi:10.1007/s00430-004-0219-0
- 340 7. Nastasi, N. *et al.* Viability of MS2 and Phi6 Bacteriophages on Carpet and Dust. *bioRxiv*  
341 2021.05.17.444479 (2021). doi:10.1101/2021.05.17.444479
- 342 8. Renninger, N. *et al.* Indoor Dust as a Matrix for Surveillance of COVID-19. *mSystems* **6**,  
343 (2021).
- 344 9. Wang, X., Sun, S., Zhang, B. & Han, J. Solar heating to inactivate thermal-sensitive  
345 pathogenic microorganisms in vehicles: application to COVID-19. *Env. Chem Lett* 1–8  
346 (2020). doi:10.1007/s10311-020-01132-4
- 347 10. Tracing surface and airborne SARS-CoV-2 RNA inside public buses and subway trains |  
348 Elsevier Enhanced Reader. Available at:  
349 [https://reader.elsevier.com/reader/sd/pii/S0160412020322819?token=08BACA22F0A1E193](https://reader.elsevier.com/reader/sd/pii/S0160412020322819?token=08BACA22F0A1E193CD7E298C39BD7F6E7B1B522EE43F3F9C6B3DAB8FB7DFBFCF7BA30011C61C84A79AFDD1850A2B78C3&originRegion=us-east-1&originCreation=20210810143931)  
350 [CD7E298C39BD7F6E7B1B522EE43F3F9C6B3DAB8FB7DFBFCF7BA30011C61C84A79AF](https://reader.elsevier.com/reader/sd/pii/S0160412020322819?token=08BACA22F0A1E193CD7E298C39BD7F6E7B1B522EE43F3F9C6B3DAB8FB7DFBFCF7BA30011C61C84A79AFDD1850A2B78C3&originRegion=us-east-1&originCreation=20210810143931)  
351 [DD1850A2B78C3&originRegion=us-east-1&originCreation=20210810143931](https://reader.elsevier.com/reader/sd/pii/S0160412020322819?token=08BACA22F0A1E193CD7E298C39BD7F6E7B1B522EE43F3F9C6B3DAB8FB7DFBFCF7BA30011C61C84A79AFDD1850A2B78C3&originRegion=us-east-1&originCreation=20210810143931). (Accessed:  
352 10th August 2021)
- 353 11. Saif, L. J. Bovine respiratory coronavirus. *Veterinary Clinics of North America - Food Animal*  
354 *Practice* (2010). doi:10.1016/j.cvfa.2010.04.005
- 355 12. Saif, L. J. & Jung, K. Comparative pathogenesis of bovine and porcine respiratory  
356 coronaviruses in the animal host species and SARS-CoV-2 in humans. *J. Clin. Microbiol.*  
357 (2020). doi:10.1128/jcm.01355-20
- 358 13. Hasoksuz, M., Vlasova, A. & Saif, L. J. Detection of Group 2a Coronaviruses with Emphasis  
359 on Bovine and Wild Ruminant Strains: Virus Isolation and Detection of Antibody, Antigen,  
360 and Nucleic Acid. *SARS- and Other Coronaviruses* **454**, 43 (2008).
- 361 14. Benfield, D. A. & Saif, L. J. Cell culture propagation of a coronavirus isolated from cows with  
362 winter dysentery. *J Clin Microbiol* **28**, 1454–1457 (1990).
- 363 15. Biryukov, J. *et al.* SARS-CoV-2 is rapidly inactivated at high temperature. *Env. Chem Lett* 1–  
364 5 (2021). doi:10.1007/s10311-021-01187-x
- 365 16. Coleman, C. M. & Frieman, M. B. Growth and Quantification of MERS-CoV Infection. *Curr*  
366 *Protoc Microbiol* **37**, 15E.2.1–9 (2015).
- 367 17. Lindenbach, B. D. Measuring HCV infectivity produced in cell culture and in vivo. *Methods*  
368 *Mol Biol* **510**, 329–336 (2009).
- 369 18. Jacob Machado, D., Scott, R., Guirales, S. & Janies, D. A. Fundamental evolution of all  
370 Orthocoronavirinae including three deadly lineages descendent from Chiroptera-hosted  
371 coronaviruses: SARS-CoV, MERS-CoV and SARS-CoV-2. *Cladistics* (2021).  
372 doi:10.1111/cla.12454
- 373 19. Schneider, A. de B., Machado, D. J., Guirales, S. & Janies, D. A. FLAVi: An Enhanced  
374 Annotator for Viral Genomes of Flaviviridae. *Viruses* 2020, Vol. 12, Page 892 **12**, 892 (2020).
- 375 20. Wenzel, J. Origins of SARS-CoV-1 and SARS-CoV-2 are often poorly explored in leading  
376 publications. *Cladistics* **36**, 374–379 (2020).

- 377 21. Grant, T. Outgroup sampling in phylogenetics: Severity of test and successive outgroup  
378 expansion. *J. Zool. Syst. Evol. Res.* **57**, 748–763 (2019).
- 379 22. K, K., K, M., K, K. & T, M. MAFFT: a novel method for rapid multiple sequence alignment  
380 based on fast Fourier transform. *Nucleic Acids Res.* **30**, 3059–3066 (2002).
- 381 23. K, K. & DM, S. MAFFT multiple sequence alignment software version 7: improvements in  
382 performance and usability. *Mol. Biol. Evol.* **30**, 772–780 (2013).
- 383 24. Goloboff, P. A., Farris, J. S. & Nixon, K. C. TNT, a free program for phylogenetic analysis.  
384 *Cladistics* **24**, 774–786 (2008).
- 385 25. Nguyen, L.-T., Schmidt, H. A., von Haeseler, A. & Minh, B. Q. IQ-TREE: A Fast and Effective  
386 Stochastic Algorithm for Estimating Maximum-Likelihood Phylogenies. *Mol. Biol. Evol.* **32**,  
387 268–274 (2015).
- 388 26. Chernomor, O., von Haeseler, A. & Minh, B. Q. Terrace Aware Data Structure for  
389 Phylogenomic Inference from Supermatrices. *Syst. Biol.* **65**, 997–1008 (2016).
- 390 27. Kalyaanamoorthy, S., Minh, B. Q., Wong, T. K. F., von Haeseler, A. & Jermin, L. S.  
391 ModelFinder: fast model selection for accurate phylogenetic estimates. *Nat. Methods* **2017**  
392 **14**, 587–589 (2017).
- 393 28. DT, H., O, C., A, von H., BQ, M. & LS, V. UFBoot2: Improving the Ultrafast Bootstrap  
394 Approximation. *Mol. Biol. Evol.* **35**, 518–522 (2018).
- 395 29. Martin, D. P., Murrell, B., Golden, M., Khoosal, A. & Muhire, B. RDP4: Detection and analysis  
396 of recombination patterns in virus genomes. *Virus Evol.* **1**, (2015).
- 397 30. Machado, D. J., Scott, R., Guirales, S. & Janies, D. A. Fundamental evolution of all  
398 Orthocoronavirinae including three deadly lineages descendent from Chiroptera-hosted  
399 coronaviruses: SARS-CoV, MERS-CoV and SARS-CoV-2. *Cladistics* (2021).  
400 doi:10.1111/CLA.12454
- 401 31. Radostits, O. M., Gay, C. C., Hinchcliff, K. W. & Constable, P. D. *Veterinary Medicine E-*  
402 *Book: A textbook of the diseases of cattle, horses, sheep, pigs and goats.* (Elsevier Health  
403 Sciences, 2006).
- 404 32. Bok, M. *et al.* Molecular and antigenic characterization of bovine Coronavirus circulating in  
405 Argentinean cattle during 1994–2010. *Vet Microbiol* **181**, 221–229 (2015).
- 406 33. KP, A. *et al.* Bovine-like coronaviruses isolated from four species of captive wild ruminants  
407 are homologous to bovine coronaviruses, based on complete genomic sequences. *J. Virol.*  
408 **82**, 12422–12431 (2008).
- 409 34. Zhang, X. *et al.* Quasispecies of bovine enteric and respiratory coronaviruses based on  
410 complete genome sequences and genetic changes after tissue culture adaptation. *Virology*  
411 **363**, 1 (2007).
- 412 35. Lotfollahzadeh, S., Madadgar, O., Reza Mohebbi, M., Reza Mokhber Dezfouli, M. & George  
413 Watson, D. Bovine coronavirus in neonatal calf diarrhoea in Iran. *Vet Med Sci* **6**, 686–694  
414 (2020).
- 415 36. Ford. Ford Press Release. (2020).
- 416 37. Gamble, A. *et al.* Heat-treated virus inactivation rate depends strongly on treatment  
417 procedure. *bioRxiv* 2020.08.10.242206 (2020). doi:10.1101/2020.08.10.242206
- 418 38. (EPA), U. S. E. P. A. GUIDANCE FOR CLEANING AND DISINFECTING PUBLIC SPACES,  
419 WORKPLACES, BUSINESSES, SCHOOLS, AND HOMES. CS316485C (2020).
- 420 39. Storm, N. *et al.* Rapid and complete inactivation of SARS-CoV-2 by ultraviolet-C irradiation.  
421 *Sci Rep* **10**, 22421 (2020).
- 422 40. Jo, H., West, A. M., Teska, P. J., Oliver, H. F. & Howarter, J. A. Assessment of early onset  
423 surface damage from accelerated disinfection protocol. *Antimicrob. Resist. Infect. Control*  
424 **2019 81 8**, 1–10 (2019).
- 425 41. Raeiszadeh, M. & Adeli, B. A Critical Review on Ultraviolet Disinfection Systems against  
426 COVID-19 Outbreak: Applicability, Validation, and Safety Considerations.



- 427 doi:10.1021/acsp Photonics.0c01245  
428 42. S, D., L, C., N, K. & R, F. Clothing as protection from ultraviolet radiation: which fabric is  
429 most effective? *Int. J. Dermatol.* **36**, 374–379 (1997).  
430 43. Heat Sterilisation - an overview | ScienceDirect Topics. Available at:  
431 <https://www.sciencedirect.com/topics/engineering/heat-sterilisation>. (Accessed: 10th August  
432 2021)  
433 44. Morris, D. H. *et al.* Mechanistic theory predicts the effects of temperature and humidity on  
434 inactivation of SARS-CoV-2 and other enveloped viruses. *Elife* **10**, e65902 (2021).  
435 45. Wigginton, K. R., Penson, B. M., Sigstam, T., Bosshard, F. & Kohn, T. Virus inactivation  
436 mechanisms: impact of disinfectants on virus function and structural integrity. *Env. Sci*  
437 *Technol* **46**, 12069–12078 (2012).  
438 46. Rezaei, N. *et al.* A novel methodology and new concept of SARS-CoV-2 elimination in  
439 heating and ventilating air conditioning systems using waste heat recovery. *AIP Adv* **10**,  
440 85308 (2020).  
441 47. Samet, J. M. *et al.* Airborne Transmission of SARS-CoV-2: What We Know. *Clin Infect Dis*  
442 ciab039 (2021). doi:10.1093/cid/ciab039  
443 48. Tang, J. W. *et al.* Dismantling myths on the airborne transmission of severe acute respiratory  
444 syndrome coronavirus-2 (SARS-CoV-2). *J Hosp Infect* **110**, 89–96 (2021).  
445 49. Biryukov, J. *et al.* Increasing Temperature and Relative Humidity Accelerates Inactivation of  
446 SARS-CoV-2 on Surfaces. *mSphere* **5**, e00441-20 (2020).  
447
